# Supplementary material for: Endoplasmic reticulum stress in bone marrow-derived cells prevents acute cardiac inflammation and injury in response to angiotensin II
Source: PubMed Central journal article supplement (PMC5143392; doi:10.1038/cddis.2016.164), 2016-06-09

**A**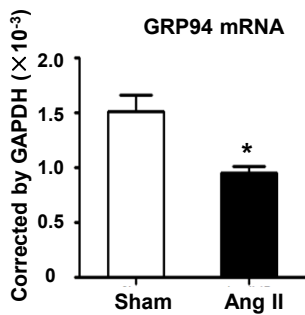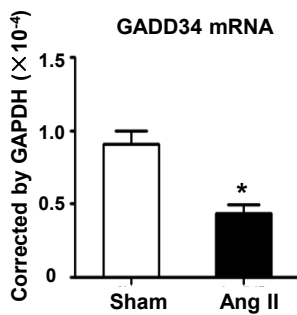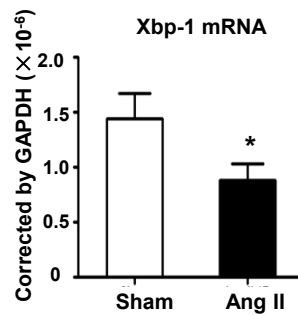**B**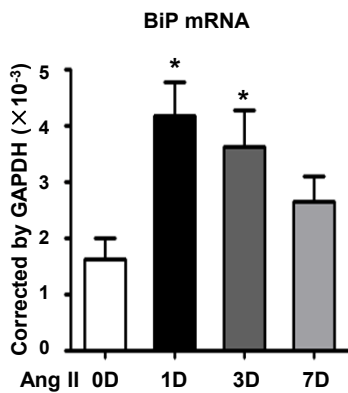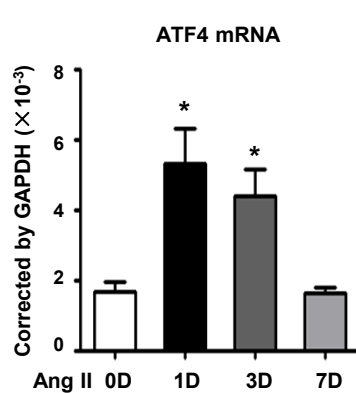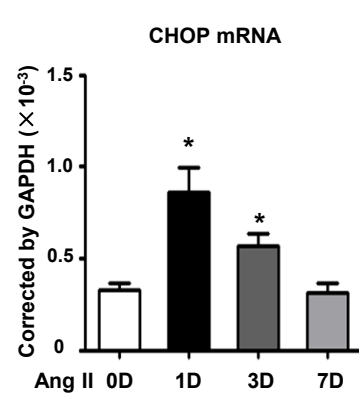

Supplement: cddis2016164x2.pdf [file cddis2016164x2.pdf]
